# Supplementary material for: Tandem-column extraction chromatography for Nd separation: minimizing mass-independent isotope fractionation for ultrahigh-precision Nd isotope-ratio analysis
Source: Royal Society of Chemistry journal article supplement (doi:10.1039/d1ja00365h), 2021-12-02
Supplement: d1ja00365h1.xlsx [file d1ja00365h1.xlsx]

## Sheet: Data
Table S1. Nd isotope data of standard materials and samples
Sample	142Nd/144Nd	2 Std Error	143Nd/144Nd	2 Std Error	145Nd/144Nd	2 Std Error	148Nd/144Nd	2 Std Error	150Nd/144Nd stat	2 Std Error	140Ce/144Nd	147Sm/144Nd	u142	2SE	u143	2SE	u145	2SE	u148	2SE	u150	2SE
Doped Jndi
B34F3 doped Jndi a1	1.14184	2.12901e-06	0.5121	7.18456e-07	0.348404	4.16775e-07	0.241579	6.60271e-07	0.236483	1.55708e-06	3.98915e-06	2.28935e-07	-0.637762	1.86455	-0.0840085	1.40296	1.14553	1.19624	-5.339	2.73314	-23.1579	6.58417
B34F4 doped Jndi b1	1.14184	2.28831e-06	0.512098	8.04208e-07	0.348403	4.77312e-07	0.241581	7.41847e-07	0.236484	1.74479e-06	-2.40243e-07	8.81358e-07	-0.944642	2.00406	-3.93565	1.57041	-0.656998	1.37	5.56277	3.07082	-18.1208	7.37792
B36F5 doped Jndi a2	1.14183	2.96725e-06	0.5121	1.00784e-06	0.348404	6.12933e-07	0.24158	9.62068e-07	0.23649	2.3545e-06	9.10003e-07	8.33603e-07	-2.16585	2.59867	-0.597205	1.96806	2.47304	1.75926	0.996494	3.9824	7.60817	9.9561
B36F6 doped Jndi b2	1.14184	3.19903e-06	0.512099	1.11303e-06	0.348404	6.08278e-07	0.24158	9.78668e-07	0.236499	2.44975e-06	8.94139e-07	6.2875e-06	1.54409	2.80165	-2.06594	2.17346	2.03783	1.7459	0.0107966	4.05112	44.1631	10.3588
Mean and 2SD													-0.551042	3.08969	-1.6707	3.45566	1.24985	2.77226	0.307765	8.94901
BHVO-2
B31F16 BHVO-2 d1	1.14184	2.5391e-06	0.512972	8.97727e-07	0.348404	4.82951e-07	0.241579	7.50339e-07	0.236469	1.98135e-06	3.85207e-07	4.27339e-07	-0.162166	2.22369	1702.74	1.75303	0.80097	1.38618	-3.4513	3.10597	-15.8823	8.37875
B33F5 BHVO2 d1	1.14184	2.43124e-06	0.512971	8.2629e-07	0.348404	4.60514e-07	0.24158	7.3618e-07	0.236472	1.7416e-06	-1.99698e-07	6.76283e-07	-0.909206	2.12924	1701.23	1.61353	0.95762	1.32178	-1.57728	3.04736	-6.02607	7.36491
B33F6 BHVO2 d2	1.14184	3.86536e-06	0.512972	1.34798e-06	0.348403	8.12362e-07	0.241579	1.28788e-06	0.236463	3.36856e-06	8.66193e-06	-2.67175e-07	-0.394235	3.38521	1702.32	2.63227	-1.96242	2.33167	-2.51968	5.33108	-41.717	14.245
Mean and 2SD													-0.488535	0.764688	1702.1	1.56182	-0.0679433	3.28507	-2.51609	1.87403
BCR-2
B34F7 BCR-2 d1	1.14184	2.52113e-06	0.512621	8.23157e-07	0.348403	4.74687e-07	0.241579	8.00019e-07	0.236479	1.88574e-06	1.45469e-06	4.72213e-07	0.125005	2.20796	1017.02	1.60741	-0.308169	1.36246	-1.40982	3.31161	-40.569	7.97393
B33 F13 BCR-2 d2	1.14184	2.62855e-06	0.51262	9.06771e-07	0.348403	4.68129e-07	0.241579	7.32177e-07	0.236487	2.24314e-06	5.38275e-07	5.3281e-07	-2.58528	2.30203	1015.78	1.77069	-1.03011	1.34364	-1.85446	3.03079	56.9249	9.48581
B33 F14 BCR-2 d2	1.14184	2.53079e-06	0.512622	8.24486e-07	0.348403	4.84436e-07	0.24158	8.12753e-07	0.236477	1.83461e-06	5.00403e-07	1.36433e-07	-2.69704	2.21641	1018.07	1.61001	-0.567752	1.39045	-0.354134	3.36432	14.8691	7.75822
Mean and 2SD													-1.71911	3.19605	1016.96	2.29525	-0.635343	0.73137	-1.20614	1.54124
Pilbara titanite "Ln group"
B28F14 039ttn	1.14185	1.85239e-06	0.511904	6.24553e-07	0.348406	3.77795e-07	0.241577	6.20904e-07	0.236443	1.31287e-06	1.31069e-06	2.12844e-07	6.32276	1.62229	-383.181	1.21959	7.81558	1.08436	-8.49545	2.57019	-78.2531	5.55217
B28F16 116ttn	1.14184	2.63205e-06	0.511884	8.90899e-07	0.348406	5.18106e-07	0.241578	8.41017e-07	0.236455	1.86456e-06	1.19672e-06	2.06884e-07	5.29675	2.3051	-422.923	1.7397	6.38784	1.48709	-5.10574	3.48133	-26.0156	7.88527
B28F17 134ttn	1.14184	2.86012e-06	0.511901	9.68114e-07	0.348405	5.76795e-07	0.241578	9.41305e-07	0.236455	2.06186e-06	6.24427e-07	1.27916e-07	4.58001	2.50483	-388.585	1.89048	5.48057	1.65554	-6.98768	3.89646	-26.6352	8.71964
B28F18 167ttn	1.14185	1.85905e-06	0.511692	6.62483e-07	0.348406	3.80995e-07	0.241577	6.21282e-07	0.236455	1.29923e-06	6.30687e-06	1.23556e-07	11.0482	1.62812	-796.454	1.29366	7.573	1.09354	-8.45722	2.57175	-25.9213	5.49446
B29F8 039ttn_2	1.14185	2.04396e-06	0.511906	7.09565e-07	0.348407	4.11095e-07	0.241577	6.61267e-07	0.23646	1.59857e-06	1.67478e-06	1.67478e-06	6.52451	1.79006	-379.922	1.3856	10.9504	1.17994	-11.4987	2.73726	-9.4732	6.76038
B29F7 043ttn_2	1.14184	1.85985e-06	0.512673	6.59015e-07	0.348405	3.76658e-07	0.241578	6.02952e-07	0.236459	1.49288e-06	2.48423e-06	3.34447e-07	3.64082	1.62882	1118.58	1.28689	7.22712	1.0811	-9.84465	2.49587	-15.0933	6.31339
B29F6 116ttn_2	1.14185	2.68871e-06	0.511884	9.25389e-07	0.348404	5.35998e-07	0.241578	8.40603e-07	0.23646	2.04522e-06	1.81514e-06	1.79608e-07	6.73314	2.35473	-422.611	1.80705	3.8304	1.53844	-7.31625	3.47961	-11.2237	8.64927
B29F5 134ttn_2	1.14184	3.57589e-06	0.511899	1.20193e-06	0.348405	7.32828e-07	0.241579	1.19275e-06	0.236444	2.79242e-06	1.70475e-06	-6.14554e-07	2.32938	3.13169	-392.928	2.34707	6.52914	2.10339	-5.07644	4.93729	-76.1811	11.8092
B29F4 167ttn_2	1.14185	2.03144e-06	0.511691	6.94564e-07	0.348406	4.06396e-07	0.241577	6.58734e-07	0.236441	1.54064e-06	2.56538e-06	2.1467e-07	7.40853	1.77909	-799.551	1.35631	8.73084	1.16646	-14.2013	2.72677	-91.0121	6.51536
Mean and 2SD													5.98712	4.99666			7.16943	4.02118	-8.55371	5.92497
Pilbara titanite "DGA group"
B33 F15 ttn043 d2	1.14183	2.51115e-06	0.513167	8.51138e-07	0.348403	4.88757e-07	0.24158	7.68859e-07	0.236486	1.85628e-06	7.41157e-08	1.3961e-05	-4.00965	2.19922	2083.67	1.66205	-1.52782	1.40285	1.70466	3.18263	52.6787	7.84987
B33 F16 ttn116 d2	1.14183	2.38539e-06	0.511988	7.96659e-07	0.348403	4.67648e-07	0.241579	7.2428e-07	0.236484	1.86467e-06	6.1083e-06	4.45171e-07	-4.16455	2.08908	-218.543	1.55567	-1.47652	1.34226	-2.62127	2.9981	43.7342	7.88533
B33 F17 ttn039 d2	1.14184	1.9959e-06	0.511916	6.67275e-07	0.348403	4.01003e-07	0.241579	6.10983e-07	0.236492	1.48478e-06	-9.9496e-08	1.34393e-06	-2.76508	1.74797	-360.65	1.30302	-0.470187	1.15097	-2.77984	2.52911	77.5207	6.27883
B33 F18 ttn167 d2	1.14183	2.26269e-06	0.511838	7.6642e-07	0.348403	4.32196e-07	0.241579	6.6981e-07	0.23648	1.66745e-06	7.35009e-06	1.96079e-07	-3.59448	1.98162	-511.841	1.49662	0.0304858	1.24051	-3.09268	2.77262	28.0319	7.05134
B33F20 ttn134 d2	1.14183	1.86049e-06	0.511856	6.77376e-07	0.348403	3.82797e-07	0.241579	5.88161e-07	0.23649	1.43266e-06	-2.29275e-07	4.00655e-06	-3.20186	1.62938	-477.558	1.32274	-0.788766	1.09872	-3.14302	2.43464	69.1838	6.05845
Mean and 2SD													-3.54712	1.15247			-0.846561	1.33236	-1.98643	4.14947
