# Supplementary material for: Tandem-column extraction chromatography for Nd separation: minimizing mass-independent isotope fractionation for ultrahigh-precision Nd isotope-ratio analysis
Source: Royal Society of Chemistry journal article supplement (doi:10.1039/d1ja00365h), 2021-12-02
Supplement: d1ja00365h2.xlsx [file d1ja00365h2.xlsx]

## Sheet: Sheet1
Table S2: Nd isotope data of Jndi standard over a 6-month period.
Sample	142Nd/144Nd	2 Std Error	143Nd/144Nd	2 Std Error	145Nd/144Nd	2 Std Error	148Nd/144Nd	2 Std Error	150Nd/144Nd stat	2 Std Error		μ142	2SE	μ143	2SE	μ145	2SE	μ148	2SE	μ150	2SE
Feb-Mar, 2021												ppm	ppm	ppm	ppm	ppm	ppm	ppm	ppm	ppm	ppm
B28F1 Jndi	1.14184	2.39804e-06	0.5121	8.09226e-07	0.348403	4.72752e-07	0.24158	7.62276e-07	0.236457	1.61572e-06		0.156594	2.10015	0.0273146	1.58021	-1.46429	1.35691	2.6223	3.15538	-15.8485	6.83291
B28F2 Jndi	1.14184	2.4141e-06	0.512101	7.84571e-07	0.348404	4.47254e-07	0.241579	7.12857e-07	0.236457	1.57257e-06		-0.542073	2.11422	0.15565	1.53206	1.05874	1.28372	-3.05984	2.95082	-17.0566	6.65044
B28F3 Jndi	1.14184	1.89202e-06	0.512101	6.45033e-07	0.348404	3.7454e-07	0.241579	5.90149e-07	0.236462	1.31396e-06		-0.0665509	1.657	0.126266	1.25958	0.0048073	1.07502	-1.66634	2.44288	3.78202	5.55677
B28F4 Jndi	1.14184	3.51108e-06	0.5121	1.12054e-06	0.348404	6.58482e-07	0.24158	1.12137e-06	0.236464	2.27221e-06		-0.105794	3.07494	-0.00628595	2.18812	0.355656	1.89	1.16056	4.64181	12.3904	9.60922
B28F5 Jndi	1.14184	2.59943e-06	0.512101	8.54728e-07	0.348404	5.13312e-07	0.24158	8.00011e-07	0.236465	1.61553e-06		0.557824	2.27653	0.0899556	1.66906	0.045092	1.47332	0.943319	3.31159	16.7327	6.8321
B29F1 Jndi	1.14184	2.30265e-06	0.5121	8.11603e-07	0.348403	4.47305e-07	0.24158	6.83898e-07	0.236455	1.79647e-06		0.520938	2.01662	-0.0552036	1.58485	0.231222	1.28387	-0.832495	2.83094	-30.482	7.59727
B29F2 Jndi	1.14184	2.23396e-06	0.512099	8.31528e-07	0.348403	4.61695e-07	0.24158	7.10946e-07	0.236464	1.72443e-06		-1.64128	1.95646	-0.196947	1.62376	-1.10007	1.32517	-1.25489	2.9429	7.70269	7.29261
B29F9 Jndi	1.14184	2.71637e-06	0.5121	8.74897e-07	0.348403	5.34995e-07	0.24158	8.79014e-07	0.236468	2.04827e-06		1.12034	2.37895	-0.140749	1.70845	0.868852	1.53556	2.08738	3.6386	22.7793	8.66214
May, 2021
B31F1 Jndi	1.14184	1.89941e-06	0.5121	6.4942e-07	0.348403	3.78897e-07	0.24158	6.08802e-07	0.236464	1.53438e-06		-0.978643	1.66346	-0.161305	1.26815	-0.24003	1.08752	1.16512	2.52008	-38.0349	6.48859
B31F3 Jndi	1.14184	1.81503e-06	0.512101	6.46827e-07	0.348403	3.89353e-07	0.24158	6.07115e-07	0.236458	1.36024e-06		1.71075	1.58957	0.458442	1.26309	-0.0487732	1.11753	-0.101436	2.5131	-64.1045	5.75217
B31F4 Jndi	1.14184	2.51937e-06	0.512101	8.64897e-07	0.348403	5.13598e-07	0.241579	7.768e-07	0.23647	1.85429e-06		1.66463	2.20642	0.61169	1.68892	-1.44287	1.47415	-2.36431	3.2155	-13.5085	7.84142
B31F5 Jndi	1.14184	2.11006e-06	0.5121	7.23492e-07	0.348403	4.38197e-07	0.241579	6.63614e-07	0.236475	1.70423e-06		-2.65844	1.84795	-0.0397065	1.41279	-0.33345	1.25773	-3.75857	2.74698	6.90614	7.20686
Jun-Jul, 2021
B33F1 Jndi	1.14184	1.87374e-06	0.5121	6.61081e-07	0.348403	3.79255e-07	0.24158	5.97243e-07	0.236486	1.40464e-06		-0.932435	1.64099	-0.259898	1.29092	-0.410984	1.08855	-1.37004	2.47224	54.1708	5.93997
B33F2 Jndi	1.14184	1.97638e-06	0.512099	6.92815e-07	0.348404	3.99941e-07	0.241581	6.09393e-07	0.23647	1.50833e-06		-0.173678	1.73088	-1.58735	1.35289	1.39775	1.14792	2.32456	2.52253	-15.0546	6.37846
B33F7Jndi	1.14184	2.08238e-06	0.512101	7.13667e-07	0.348403	4.20173e-07	0.241581	6.44448e-07	0.236472	1.59347e-06		1.78822	1.82371	1.2002	1.39361	-0.200341	1.206	3.0451	2.66764	-7.04576	6.73846
B33F8 Jndi	1.14184	1.85553e-06	0.5121	6.62745e-07	0.348404	3.86504e-07	0.24158	6.22352e-07	0.236491	1.458e-06		-0.420418	1.62504	-0.222076	1.29417	1.2787	1.10936	1.05957	2.57617	76.6713	6.1656
B34F1 Jndi	1.14184	1.74781e-06	0.5121	5.58504e-07	0.348404	3.45139e-07	0.24158	5.2961e-07	0.236485	1.29933e-06		-0.287572	1.5307	-0.185936	1.09061	1.21458	0.990631	-0.343019	2.19228	-14.0037	5.49427
B34F2 Jndi	1.14184	2.12401e-06	0.5121	7.39034e-07	0.348403	4.27773e-07	0.24158	6.86465e-07	0.236499	1.5923e-06		0.563968	1.86017	-0.228099	1.44314	-0.0103541	1.22781	2.26476	2.84157	44.5836	6.73308
B36F2 Jndi	1.14183	2.65474e-06	0.5121	8.86136e-07	0.348402	5.17337e-07	0.241579	8.11499e-07	0.236476	1.94233e-06		-2.07694	2.32497	0.19742	1.7304	-2.1023	1.48488	-3.24055	3.35914	-52.1802	8.21321
B36F3 Jndi	1.14184	2.83001e-06	0.5121	9.82169e-07	0.348403	5.73843e-07	0.24158	9.11147e-07	0.236494	2.10972e-06		1.80055	2.47848	0.216616	1.91792	0.898075	1.64707	1.31881	3.77162	21.6002	8.92104
											2SD (ppm)	2.54718		1.02312		1.95554		4.20839
